# Supplementary material for: Characterization and Fungicide Sensitivity of Two <em>Fusarium spp</em>. Associated With Stem Rot of Dragon Fruit in Guizhou, China
Source: Preprints.org preprint supplement (doi:10.20944/preprints202310.1930.v1), 2023-11-01
Supplement: Supplementary file 2 [file supplementary]

## Sheet: Sheet1
Table S1. A list of species, isolates, and GenBank accession numbers of sequences used in this study.
Species name	Isolates	Locality	Sequence accession number
			ITS	EF-1α	RPB2
Fusarium agapanthi	NRRL 54463	Australia	–	–	KU900625
F. ananatum	CBS 118516	South Africa	–	LT996091	LT996137
F. anthophilum	CBS 737.97 = NRRL 13602	Germany	KU604033.1	LT996093	LT996139
F. circinatum	CBS 405.97T = NRRL 25331	USA	KC464617.1	KM231943	HM068354
F. coicis	NRRL 66233	Australia	–	KP083251	KP083274
F. concentricum	CBS 450.97T = NRRL 25181	Costa Rica	U61678.1	AF160282	JF741086
F. dlaminii	CBS 119860T = NRRL 13164	South Africa	NR182425.1	AF160277	KU171701
F. fredkrugeri	CBS 144210 = NRRL 26061	Madagascar	–	AF160303	LT996145
F. fujikuroi	NRRL 13566	China	–	AF160279	JX171570
F. konzum	CBS 119849T	USA	–	LT996098	LT996148
F. lactis	CBS 411.97NT = NRRL 25200	USA	U61681.1	AF160272	LT996149
F. mangiferae	NRRL 25226	Israel	U61691.1	AF160281	HM068353
F. nygamai	CBS 749.97T = NRRL 13448	Australia	–	AF160273	EF470114
F. oxysporum	CBS 716.74 = NRRL 20433	Germany	U34577.1	AF008479	JX171583
F. oxysporum	CBS 744.97 = NRRL 22902	USA	–	AF160312	LT575065
F. oxysporum	H-4	China	OR668933	OR668934	OR668935
F. phyllophilum	CBS 216.76T = NRRL 13617	Italy	NR_182426.1	KF466421	KF466410
F. proliferatum	CBS 217.76 = NRRL 22944	Germany	U34558.1	AF160280	HM068352
F. pseudocircinatum	CBS 449.97T = NRRL 22946	Ghana	MG838044.1	AF160271	LT996151
F. pseudonygamai	CBS 417.97T = NRRL 13592	Nigeria	NR137162.1	AF160263	LT996152
F. ramigenum	CBS 418.98T = NRRL 25208	USA	NR111888.1	KF466423	KF466412
F. sacchari	CBS 223.76 = NRRL 13999	India	NR174875.1	AF160278	JX171580
F. subglutinans	CBS 747.97 = NRRL 22016	USA	NR182424.1	AF160289	JX171599
F. succisae	CBS 219.76 = NRRL 13613	Germany	NR174876.1	AF160291	LT996154
F. sudanense	CBS 454.97T = NRRL 25451	Sudan	–	KU711697	LT996155
F. thapsinum	CBS 733.97 = NRRL 22045	South Africa	–	AF160270	JX171600
F. tjaetaba	NRRL 66243T	Australia	–	KP083263	KP083275
F. verticillioides	CBS 734.97 = NRRL 22172	Germany	–	AF160262	EF470122
F. xylarioides	CBS 258.52 = NRRL 25486	Ivory Coast	–	AY707136	HM068355
F. acutatum	NRRL 13308	India	–	AF160276	KT154005
F. andiyazi	CBS 119857	South Africa	KR071651.1	KP662901	KT154004
F. circinatum	NRRL 25331	USA	–	AF160295	JX171623
F. concentricum	NRRL 25181	Costa Rica	NR111886.1	AF160282	LC133069
F. concentricum	H-5	China	OR668936	OR668937	OR668938
F. dlaminii	NRRL 13164	South Africa	NR182425.1	AF160277	KU171701.1
F. ficicrescens	CBS 125178	Iran	NR152915.1	KP662899	KT154002
F. fujikuroi	NRRL 13566	China	–	AF160279	EF470116
F. guttiforme	NRRL 22945	England	U34562.1	AF160297	JX171618
F. lactis	NRRL 25200	USA	NR111887.1	AF160272	KM582794
F. mangiferae	NRRL 25226	Israel	–	AF160281	JX171622
F. musae	NRRL 28893	Mexico	–	FN552092	FN552114
F. napiforme	NRRL 13604	Namibia	NR149349.1	AF160266	EF470117
F. nygamai	NRRL 13448	Wales	NR130698.1	AF160273	EF470114
F. phyllophilum	NRRL 13617	Italy	NR182426.1	AF160274	KF466410
F. proliferatum	NRRL 22944	USA	U34558.1	AF160280	JX171617
F. proliferatum	CBS 480.96	Papua New Guinea	–	MN534059	MN534272
F. sacchari	NRRL 13999	India	NR174875.1	AF160278	JX171580
F. terricola	CBS 119850	Australia	KU604039.1	KU711699	KU604268
F. thapsinum	NRRL 22045	South Africa	–	AF160270	JX171600
"–": the sequence accession numbers were not found in GenBank.
